# Supplementary material
Source: PubMed Central journal article supplement (PMC8130528)
Supplement: 13073_2021_904_MOESM2_ESM.pdf [file 13073_2021_904_MOESM2_ESM.pdf]

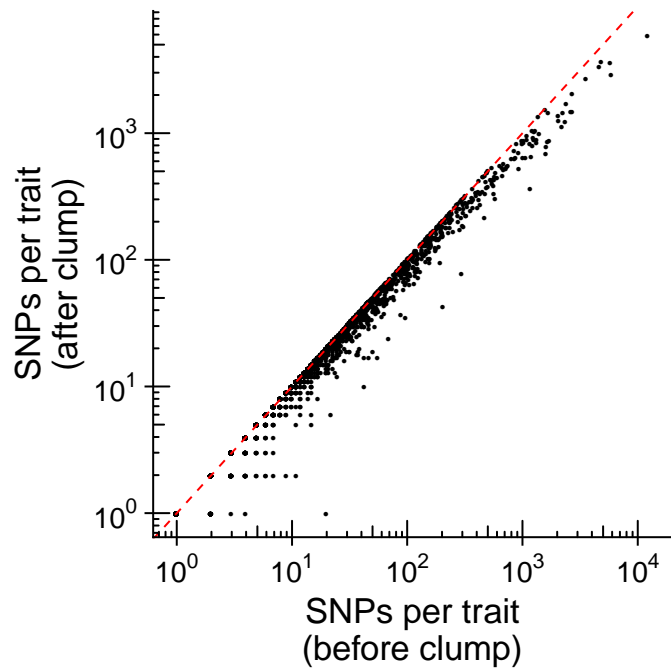

**Fig. S1.** Clumping of GWAS results from NHGRI-EBI GWAS catalog. For each GWAS traits, we performed LD clumping to only keep the lead SNP in each region.
